# Supplementary material for: Epigenetic modelling of former, current and never smokers
Source: Clin Epigenetics. 2021 Nov 17;13:206. doi: 10.1186/s13148-021-01191-6 (PMC8597260; doi:10.1186/s13148-021-01191-6)
Supplement: Supplementary file 1 — Additional file 1. Supplementary Table 1 - LASSO model constituent CpGs, betas and gene symbol information. [file 13148_2021_1191_MOESM1_ESM.xlsx]

## Sheet: Sheet1
Additional file 1: Table S1 - LASSO model constituent CpGs, betas and gene symbol information
Classes	Model name	CpG	Beta	Chromosome	Position	Gene symbol
Ever vs never	Candidate CpG LASSO	cg25189904	-0.39029	chr1	68299493	GNG12
		cg06644428	-2.68987	chr2	233284402	-
		cg05951221	-10.4744	chr2	233284112	ALPPL2
		cg23916896	-2.45803	chr5	373378	AHRR
		cg05575921	-3.80411	chr5	368804	AHRR
		cg06126421	-3.78337	chr6	30720080	-
		cg01692968	-3.93616	chr9	108005349	-
		cg11660018	3.47637	chr11	86510915	PRSS23
		cg03636183	-3.84206	chr19	17000585	F2RL3
	Agnostic LASSO	cg04858586	0.103499	chr1	174843971	RABGAP1L
		cg15685922	-0.205147	chr1	156045208	MEX3A
		cg00493617	0.0335259	chr2	6141445	-
		cg00706683	-0.40712	chr2	233251030	ECEL1P2
		cg02369725	-0.91106	chr2	178936951	PDE11A
		cg05951221	1.68332	chr2	233284402	ALPPL2
		cg06644428	2.5746	chr2	233284112	-
		cg19053664	2.30284	chr2	43822995	THADA
		cg21642176	-0.302538	chr2	17699740	RAD51AP2
		cg23288337	-11.159	chr2	233250701	ECEL1P2
		cg01986605	-4.7601	chr3	127348155	PODXL2
		cg13185177	0.0791187	chr3	194119885	GP5
		cg05575921	-1.07405	chr5	373378	AHRR
		cg06126421	-0.961272	chr6	30720080	-
		cg14753356	-2.513	chr6	30720108	-
		cg18005901	0.124296	chr6	33739558	LEMD2
		cg23781467	0.15235	chr6	31760233	VARS
		cg01692968	-0.650282	chr9	108005349	-
		cg23897067	-0.269949	chr9	140100305	NDOR1
		cg20236750	0.283205	chr10	95516908	LGI1
		cg11263997	2.71721	chr11	70257280	CTTN
		cg06170683	0.442783	chr16	3740774	TRAP1
		cg07367395	-0.0102105	chr16	55090870	-
		cg19572487	-0.864925	chr17	38476024	RARA
		cg03636183	-0.876642	chr19	17000585	F2RL3
		cg03821543	-0.327384	chr20	57463925	GNAS
		cg07339236	-0.807284	chr20	50312490	ATP9A
		cg15108699	0.125074	chr20	62509164	TPD52L2
		cg24062381	0.156639	chr20	51588858	TSHZ2
Current vs former	Candidate CpG LASSO	cg09069072	-0.730325	chr1	15482753	TMEM51
		cg21913886	-0.523684	chr1	15485346	TMEM51
		cg23574443	-2.42462	chr17	8263941	LOC100128288
		cg00835193	1.82971	chr19	2291780	LINGO3
	Agnostic LASSO	cg14237550	-0.372806	chr1	16974585	MST1P2
		cg10442251	-0.160049	chr1	18700625	IGSF21
		cg09570614	0.657233	chr2	112124380	-
		cg00501876	-0.262046	chr3	39193251	CSRNP1
		cg04514392	-0.430897	chr3	107086058	-
		cg12934382	0.772065	chr3	51741135	GRM2
		cg16845623	0.146425	chr3	161090978	C3orf57
		cg05575921	-3.2587	chr5	373378	AHRR
		cg26505878	-5.76833	chr5	52405886	MOCS2
		cg26703534	0.418354	chr5	377358	AHRR
		cg17372101	-0.378937	chr7	147500722	CNTNAP2
		cg19230755	0.892759	chr7	65878503	-
		cg21709871	-0.0266318	chr8	144923606	NRBP2
		cg02257517	0.281085	chr9	136340262	SLC2A6
		cg26500457	-2.1508	chr11	122733080	CRTAM
		cg23031493	-0.596493	chr12	113902799	LHX5
		cg23594345	-1.30049	chr14	106329607	-
		cg07990681	0.224601	chr16	86666077	-
		cg15159987	-0.0445358	chr19	17003890	CPAMD8
		cg23973524	2.04122	chr19	18873222	CRTC1
