# Supplementary material for: Epigenetic modelling of former, current and never smokers
Source: Clin Epigenetics. 2021 Nov 17;13:206. doi: 10.1186/s13148-021-01191-6 (PMC8597260; doi:10.1186/s13148-021-01191-6)
Supplement: Supplementary file 4 — Additional file 4. Supplementary Tables 3a and 3b - Information pertaining to the CpG sites supplied to the ever/never and current/former candidate CpG LASSO models, respectively. [file 13148_2021_1191_MOESM4_ESM.xlsx]

## Sheet: Ever_never CpGs
Supplementary Table 3a: Information pertaining to the 12 CpG sites supplied to the ever/never Candidate CpG LASSO model
Probe type	Name	Chr	Pos	Dye colour	Gene	Gene accession	Gene region	CpG island name	Relation to island
ii	cg25189904	chr1	68299493	G	GNG12	NM_018841	TSS1500	chr1:68298371-68299315	S_Shore
ii	cg01940273	chr2	233284934	G	-	-	-	chr2:233283397-233285959	Island
ii	cg05951221	chr2	233284402	G	-	-	-	chr2:233283397-233285959	Island
i	cg06644428	chr2	233284112	R	-	-	-	chr2:233283397-233285959	Island
i	cg21566642	chr2	233284661	G	-	-	-	chr2:233283397-233285959	Island
i	cg05575921	chr5	373378	R	AHRR	NM_020731	Body	chr5:373842-374426	N_Shore
ii	cg23916896	chr5	368804	G	AHRR	NM_020731	Body	chr5:370185-370422	N_Shore
ii	cg06126421	chr6	30720080	G	-	-	-	-	OpenSea
ii	cg01692968	chr9	108005349	G	-	-	-	chr9:108006467-108007921	N_Shore
ii	cg11660018	chr11	86510915	G	PRSS23	NM_007173	TSS1500	chr11:86511184-86511889	N_Shore
ii	cg23771366	chr11	86510998	G	PRSS23	NM_007173	TSS1500	chr11:86511184-86511889	N_Shore
i	cg13937905	chr12	53612551	R	RARG;RARG	NM_001042728;NM_000966	Body;Body	chr12:53613716-53615103	N_Shore
ii	cg07251887	chr17	73641809	G	LOC100130933;RECQL5	NM_001162997;NM_004259	TSS1500;Body	-	OpenSea
ii	cg03636183	chr19	17000585	G	F2RL3	NM_003950	Body	chr19:17000627-17001398	N_Shore

## Sheet: Current_former CpGs
Supplementary Table 3b: Information pertaining to the 40 CpG sites supplied to the current/former Candidate CpG LASSO model
Probe type	Name	Chr	Pos	Dye colour	Gene	Gene accession	Gene region	CpG island name	Relation to island
ii	cg04535902	chr1	92947332	G	GFI1;GFI1;GFI1	NM_001127215;NM_001127216;NM_005263	Body;Body;Body	chr1:92945907-92952609	Island
ii	cg05228408	chr1	11865352	G	CLCN6;CLCN6;MTHFR;CLCN6;CLCN6	NM_001286;NM_021736;NM_005957;NM_021737;NM_021735	TSS1500;TSS1500;5'UTR;TSS1500;TSS1500	chr1:11865462-11866566	N_Shore
i	cg09069072	chr1	15482753	R	TMEM51;TMEM51;TMEM51;TMEM51	NM_001136218;NM_018022;NM_001136216;NM_001136217	5'UTR;5'UTR;5'UTR;5'UTR	chr1:15479219-15481471	S_Shore
ii	cg14429847	chr1	239550578	G	-	-	-	chr1:239550108-239551339	Island
ii	cg17755386	chr1	45242191	G	SNORD46;RPS8;SNORD38A	NR_000024;NM_001012;NR_001456	Body;Body;TSS1500	chr1:45241013-45241900	S_Shore
ii	cg17907003	chr1	117533414	G	-	-	-	-	OpenSea
ii	cg18857467	chr1	32787489	G	HDAC1	NM_004964	Body	-	OpenSea
i	cg19098932	chr1	2345152	G	PEX10;PEX10	NM_002617;NM_153818	TSS1500;TSS1500	chr1:2345891-2346156	N_Shore
ii	cg20951444	chr1	33337112	G	FNDC5	NM_153756	TSS1500	-	OpenSea
ii	cg21913886	chr1	15485346	G	TMEM51;TMEM51;TMEM51;TMEM51	NM_001136218;NM_018022;NM_001136216;NM_001136217	5'UTR;5'UTR;5'UTR;5'UTR	chr1:15479219-15481471	S_Shelf
ii	cg23928726	chr1	2344998	G	PEX10;PEX10	NM_002617;NM_153818	TSS1500;TSS1500	chr1:2345891-2346156	N_Shore
i	cg05611648	chr2	239050834	R	KLHL30	NM_198582	Body	chr2:239049388-239050089	S_Shore
ii	cg11723713	chr2	131721477	G	ARHGEF4;ARHGEF4	NM_032995;NM_015320	Body;Body	chr2:131720819-131721867	Island
ii	cg17490844	chr2	129039085	G	HS6ST1	NM_004807	Body	-	OpenSea
ii	cg01377807	chr3	99795240	G	C3orf26;FILIP1L;FILIP1L	NM_032359;NM_182909;NM_001042459	Body;5'UTR;5'UTR	-	OpenSea
ii	cg04039397	chr3	111260783	G	CD96;CD96	NM_198196;NM_005816	TSS200;TSS200	-	OpenSea
ii	cg04726821	chr3	37033791	G	MLH1;MLH1;MLH1;EPM2AIP1;MLH1	NM_001167618;NM_001167617;NM_001167619;NM_014805;NM_000249	TSS1500;TSS1500;TSS1500;1stExon;TSS1500	chr3:37034228-37035356	N_Shore
ii	cg06096184	chr3	66549732	G	LRIG1	NM_015541	Body	chr3:66550318-66551848	N_Shore
ii	cg25799109	chr3	57102900	G	ARHGEF3;SPATA12	NM_001128615;NM_181727	5'UTR;5'UTR	-	OpenSea
ii	cg01442064	chr4	5713450	G	EVC	NM_153717	Body	chr4:5713035-5713451	Island
i	cg02385153	chr5	404766	R	AHRR;LOC100310782	NM_020731;NR_029397	Body;TSS200	-	OpenSea
ii	cg08595501	chr5	75878300	G	IQGAP2	NM_006633	Body	-	OpenSea
i	cg21747070	chr5	957535	R	-	-	-	chr5:958785-959172	N_Shore
ii	cg05789250	chr6	31804306	G	C6orf48;C6orf48;SNORD52	NM_001040437;NM_001040438;NR_002742	5'UTR;5'UTR;TSS1500	chr6:31802598-31802823	S_Shore
ii	cg13541527	chr6	31804078	G	C6orf48;C6orf48;SNORD52	NM_001040437;NM_001040438;NR_002742	5'UTR;5'UTR;TSS1500	chr6:31802598-31802823	S_Shore
ii	cg25596754	chr6	32026610	G	TNXB	NM_019105	Body	-	OpenSea
ii	cg26218277	chr6	15390596	G	JARID2	NM_004973	Body	-	OpenSea
ii	cg10190813	chr7	48018530	G	HUS1	NM_004507	Body	chr7:48019088-48019389	N_Shore
ii	cg19798735	chr7	110730805	G	IMMP2L;LRRN3;LRRN3;LRRN3	NM_032549;NM_018334;NM_001099658;NM_001099660	Body;TSS1500;TSS1500;TSS1500	-	OpenSea
ii	cg13867370	chr9	71589563	G	PIP5K1B	NM_003558	Body	-	OpenSea
i	cg15396686	chr10	124897048	R	HMX3	NM_001105574	Body	chr10:124894075-124897366	Island
ii	cg03646605	chr11	86383804	G	ME3;ME3;ME3	NM_001014811;NM_001161586;NM_006680	TSS1500;TSS200;TSS1500	chr11:86382695-86383586	S_Shore
ii	cg13633560	chr11	76380921	G	LRRC32;LRRC32;LRRC32	NM_001128922;NM_005512;NM_005512	5'UTR;1stExon;5'UTR	chr11:76381449-76382295	N_Shore
ii	cg05875421	chr14	91709951	G	GPR68	NM_003485	5'UTR	-	OpenSea
ii	cg18369034	chr14	52733216	G	PTGDR	NM_000953	TSS1500	chr14:52734207-52735486	N_Shore
ii	cg03485667	chr16	75143200	G	ZNRF1	NM_032268	3'UTR	-	OpenSea
ii	cg06663317	chr16	56641101	G	MT2A	NM_005953	TSS1500	chr16:56642129-56642595	N_Shore
ii	cg23574443	chr17	8263941	G	LOC100128288	NR_024447	TSS200	-	OpenSea
ii	cg00835193	chr19	2291780	G	LINGO3	NM_001101391	5'UTR	chr19:2289895-2291904	Island
ii	cg27598208	chr20	62688272	G	TCEA2	NM_198723	TSS200	chr20:62688551-62688878	N_Shore
